# Supplementary material
Source: publisher site journal article supplement (https://www.kjim.org/upload/media/kjim-2023-350-Supplementary-Table-3.pdf)
Supplement: Supplementary file 1 [file kjim-2023-350-Supplementary-Table-3.pdf]

**Supplementary Table 3. Sensitivity analysis according to different set points of the FACTI-Fatigue scale or Fatigue VAS**

| Improvement                                  | Total (n = 120) | Continuous-KRG (n = 60) | Placebo-KRG (n = 60) | p value |
|----------------------------------------------|-----------------|-------------------------|----------------------|---------|
| Change in FACIT-Fatigue scale $\geq 3$       |                 |                         |                      |         |
| 0–12 weeks                                   |                 |                         |                      | 0.465   |
| Response                                     | 63 (52.5)       | 29 (48.3)               | 34 (56.7)            |         |
| None                                         | 57 (47.5)       | 31 (51.7)               | 26 (43.3)            |         |
| 0–24 weeks                                   |                 |                         |                      | > 0.999 |
| Response                                     | 72 (60.0)       | 36 (60.0)               | 36 (60.0)            |         |
| None                                         | 48 (40.0)       | 24 (40.0)               | 24 (40.0)            |         |
| Change in FACIT-Fatigue scale $\geq 4$       |                 |                         |                      |         |
| 0–12 weeks                                   |                 |                         |                      | 0.465   |
| Response                                     | 57 (47.5)       | 26 (43.3)               | 31 (51.7)            |         |
| None                                         | 63 (52.5)       | 34 (56.7)               | 29 (48.3)            |         |
| 0–24 weeks                                   |                 |                         |                      | 0.853   |
| Response                                     | 68 (56.6)       | 33 (55.0)               | 35 (58.3)            |         |
| None                                         | 52 (43.3)       | 27 (45.0)               | 25 (41.7)            |         |
| Change in Fatigue VAS $\leq -7$ (or $-6.2$ ) |                 |                         |                      |         |
| 0–12 weeks                                   |                 |                         |                      | > 0.999 |
| Response                                     | 68 (56.7)       | 34 (56.7)               | 34 (56.7)            |         |
| None                                         | 52 (43.3)       | 26 (43.3)               | 26 (43.3)            |         |
| 0–24 weeks                                   |                 |                         |                      | 0.573   |
| Response                                     | 74 (61.6)       | 39 (65.0)               | 35 (58.3)            |         |
| None                                         | 46 (38.3)       | 21 (35.0)               | 25 (41.7)            |         |

Values are presented as number (%).

FACIT-Fatigue, The Functional Assessment of Chronic Illness Therapy-Fatigue; VAS, visual analog scale; KRG, Korean Red Ginseng.
